# Supplementary material
Source: PubMed Central journal article supplement (PMC4699656)

Supplemental material for: **Perturbations in dopamine synthesis lead to discrete physiological effects and impact oxidative stress response in *Drosophila***

Marley E. Hanna<sup>1</sup>, Andrea Bednářová<sup>1,2</sup>, Kuntol Rakshit<sup>3</sup>, Anathbandhu Chaudhuri<sup>4</sup>, Janis M O'Donnell<sup>5</sup> and Natraj Krishnan<sup>1\*</sup>

<sup>1</sup>Department of Biochemistry, Molecular Biology, Entomology and Plant Pathology, Mississippi State University, Mississippi State, MS 39762, USA.

<sup>2</sup>Institute of Entomology, Biology Centre, Academy of Sciences and Faculty of Science, University of South Bohemia, Branišovská 31, 370 05 České Budějovice, Czech Republic.

<sup>3</sup>Department of Physiology and Biomedical Engineering, Mayo Clinic, 200 First St. SW, Rochester, MN 55905, USA.

<sup>4</sup>Department of Natural Sciences, Stinson Mathematics and Science Building, 3601 Stillman Blvd, Stillman College, Tuscaloosa, AL 35043, USA

<sup>5</sup>Department of Biological Sciences, The University of Alabama, Tuscaloosa, AL 35487, USA

\*Corresponding author: Phone: 662-325-2978, Fax: 662-325-8837

E-mail: [nk260@msstate.edu](mailto:nk260@msstate.edu)

**Supplemental Table 2.1:** List of primers and their sequences used in this study.

| Gene           | Forward primer (5'-3')                 | Reverse primer (5'-3')                |
|----------------|----------------------------------------|---------------------------------------|
| <i>rp49</i>    | ACG TTG TGC ACC AGG AAC TT             | CCA GTC GGA TCG ATA TGC TAA           |
| <i>Cat</i>     | AGA TGC TGC ATG GTC GTC TGT TGT TCT    | TCC ATC CCG CTG GAA GTT CTC AAT       |
| <i>MnSOD</i>   | ACA TCA CCG ACT CCA AGA TTA C          | TTG CCC GTT GAC TTG CT                |
| <i>CuZnSOD</i> | TAA ATT GAT TAA TTC ATT CG             | ACA TCG GAA TAG ATT ATC GC            |
| <i>GSTO1</i>   | CAT ATG AGC AAT ACT CAG CAC TTA ACT AT | GGA TCC CTA CCC CAA TTT GAC ACG TTT G |
| <i>GSTO3</i>   | CAT ATG AGT TCT GGT AAA CAT TTG GCC AA | GGA TCC CTA AGC CAG CAG ATC GTA GTT T |

**Figure S1:** Representative double-plotted actograms and periodograms of  $w^{1118}$ , Canton-S, *Catsup*<sup>26</sup>, *ple*<sup>2</sup>, *Pu*<sup>Z22</sup> and *VMAT*<sup>A14</sup> flies ~ 6-8 days after adult eclosion. Flies were entrained for 3 days in 12h:12h LD (Light/Dark) cycles before being maintained in constant darkness (DD) for 7-10 days. Actograms and periodograms were generated using ClockLab (Actrimetrics). The Y-axis on actograms represents days, whereas the top axis denotes hours in military time (for further details refer to the text).

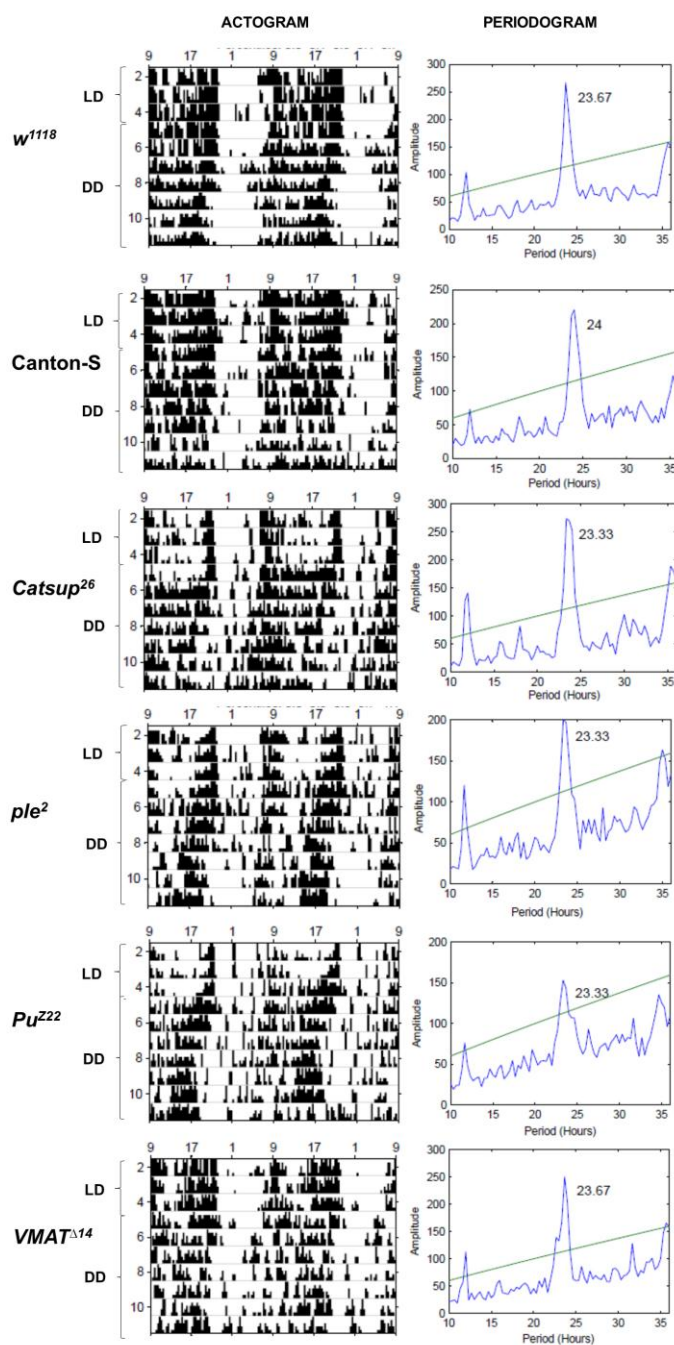

**Figure S2:** Representative double-plotted actograms and periodograms of *elav-Gal4/UAS-Catsup-RNAi* and *TH-Gal4/UAS-Catsup-RNAi* flies ~ 6-8 days after adult eclosion. Flies were entrained for 3 days in 12h:12h LD (Light/Dark) cycles before being maintained in constant darkness (DD) for 7-10 days. Actograms and periodograms were generated using ClockLab (Actrimetrics). The Y-axis on actograms represents days, whereas the top axis denotes hours in military time (for further details refer to the text).

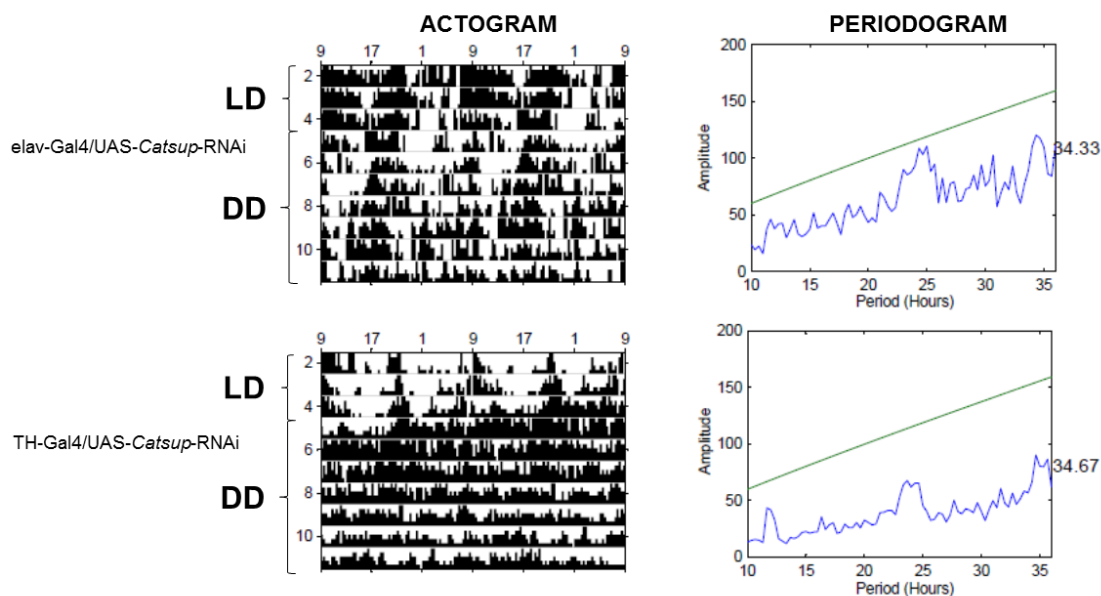

Supplement: NIHMS747247-supplement-Supplemental_material.pdf [file NIHMS747247-supplement-Supplemental_material.pdf]
